1           **CBRPP: a new RNA-centric method to study RNA-protein**  
2                                                                         **interactions**

3    Yunfei Li <sup>1</sup>, Shengde Liu <sup>1</sup>, Lili Cao <sup>1</sup>, Yujie Luo <sup>1</sup>, Hongqiang Du <sup>1</sup>, Siji Li <sup>1</sup>, Fuping You <sup>1, #</sup>

4    <sup>1</sup> Institute of Systems Biomedicine, Department of Immunology, School of Basic Medical  
5    Sciences, Beijing Key Laboratory of Tumor Systems Biology, Peking University Health Science  
6    Center, Beijing, China.

7    # Corresponding authors: Fuping You Ph.D, Institute of Systems Biomedicine, Department of  
8    Pathology, School of Basic Medical Sciences, Beijing Key Laboratory of Tumor Systems Biology,  
9    Peking University Health Science Center, Beijing, China. [fupingyou@hsc.pku.edu.cn](mailto:fupingyou@hsc.pku.edu.cn).

## 10 **Abstract**

11 RNA-protein interactions play essential roles in tuning gene expression at RNA level and  
12 modulating the function of proteins. Abnormal RNA-protein interactions lead to cell dysfunction  
13 and human diseases. Therefore, mapping networks of RNA-protein interactions is crucial for  
14 understanding cellular mechanism and pathogenesis of diseases. Different practical protein-centric  
15 methods for studying RNA-protein interactions has been reported, but few RNA-centric methods  
16 exist. Here, we developed CRISPR-based RNA proximity proteomics (CBRPP), a new  
17 RNA-centric method to identify proteins associated with the target RNA in native cellular context  
18 without cross-linking or RNA manipulation in vitro. CBRPP is based on a fusion of dCas13 and  
19 proximity-based labeling (PBL) enzyme. dCas13 can deliver PBL enzyme to the target RNA with  
20 high specificity, while PBL enzyme labels the surrounding proteins of the target RNA, which are  
21 then identified by mass spectrometry.

22 **Keywords:** RNA-protein interactions, dPspCas13b, dRfxCas13d, APEX2, TurboID, BASU,  
23 BioID2, CBRPP

## 24 **Introduction**

25 RNA is bound to protein from birth to death. RNA-binding proteins (RBPs) play a pivotal role  
26 in a wide range of biological processes, including RNA transcription, processing, modification,  
27 transport, translation and stabilization<sup>[1-4]</sup>. RNAs, in turn, influence proteins expression,  
28 localization and interactions with other proteins<sup>[5-7]</sup>. Aberrant RNA-protein interactions are related  
29 to cellular dysfunction and human diseases<sup>[3, 8, 9]</sup>. Therefore, mapping networks of RNA-protein  
30 interactions is of great importance for understanding many cellular biological processes.

31 Based on the type of molecule they start with, methods for studying RNA-protein interactions  
32 are classified into protein-centric methods and RNA-centric methods<sup>[10]</sup>. Protein-centric methods  
33 start with a protein of interest and study RNAs that interact with that protein. Since proteins are  
34 easily purified with antibodies, many protein-centric methods, such as cross-linking  
35 immunoprecipitation (CLIP)-seq<sup>[11]</sup> and RNA immunoprecipitation (RIP)-seq<sup>[12]</sup>, are available and  
36 practical. Conversely, RNA-centric methods start with an RNA of interest and focus on proteins  
37 that bind it. Most approaches use biotinylated RNA<sup>[13]</sup>, aptamer-tagged RNA<sup>[14]</sup>, peptide nucleic  
38 acid<sup>[15]</sup> and antisense probe<sup>[16-20]</sup> for purification of RNA-protein complexes to identify proteins  
39 that associate with the target RNA, however these methods often require RNA manipulation in  
40 vitro and miss transient or weak interactions. Meanwhile, compared with protein-centric methods,  
41 there are few robust RNA-centric methods.

42 In this paper, by combining the power of CRISPR-Cas13<sup>[21]</sup> and proximity-based labeling (PBL)  
43 technique<sup>[22]</sup>, we developed CBRPP (CRISPR-based RNA proximity proteomics), a new  
44 RNA-centric method to identify proteins associated with the target RNA in native cellular context  
45 without cross-linking or RNA manipulation in vitro.

46

## 47 **Results**

### 48 **Strategies to develop CBRPP**

49 In recent years, PBL has emerged as a powerful complementary approach to classic affinity  
50 purification of multiprotein complexes in mapping of protein-protein interactions<sup>[23]</sup>. By fusing  
51 proteins of interest to enzymes that generate reactive molecules, most commonly biotin, adjacent  
52 proteins are covalently labeled so that they can be isolated and identified<sup>[22]</sup>. To date, multiple  
53 versions of the PBL enzyme have been developed, such as BioID2<sup>[24]</sup>, TurboID<sup>[25]</sup>, Apex2<sup>[26]</sup> and  
54 BASU<sup>[27]</sup>. The key advantage of PBL is that it can capture weak and transient interactions in live  
55 cells. Recently, two studies have applied PBL to study RNA-protein interactions using the  
56 MS2-MCP strategy<sup>[28]</sup> or a similar strategy<sup>[27]</sup>, but both require insertion of MS2 or BoxB  
57 stem-loop into the target RNA in advance, which may influence structure or function of the target  
58 RNA.

59 The discovery of RNA-targeting CRISPR systems offers scientists a powerful toolbox to  
60 manipulate RNA in live cells<sup>[21]</sup>. Active Cas13, under the guidance of the specific CRISPR RNA  
61 (crRNA), can recognize and cleave the target RNA. Catalytically dead Cas13 (dCas13) retains  
62 programmable RNA-binding capability, which can be utilized for RNA imaging and editing<sup>[29,30]</sup>.  
63 Currently, there are several orthologs and subtypes of Cas13 that are catalytically active inside  
64 mammalian cells, including LwaCas13a<sup>[29]</sup>, PspCas13b<sup>[30]</sup> and RfxCas13d<sup>[31]</sup>. Inspired by  
65 GLoPro<sup>[32]</sup> and C-BERST<sup>[33]</sup>, we proposed that by fusing dCas13 and PBL enzyme together,  
66 dCas13, under the guidance of a specific crRNA, can act as an RNA tracker to bring PBL enzyme  
67 to the target RNA, then PBL enzyme can biotinylate the surrounding proteins of the target RNA  
68 with biotin. Finally, these biotinylated proteins can be easily enriched by streptavidin beads and  
69 identified by liquid chromatography mass spectrometry (LC-MS) (Figure 1). We referred to this  
70 combination of CRISPR-Cas13 and PBL as CRISPR-based RNA proximity proteomics (CBRPP).

### 71 **dRfxCas13d is not suitable for CBRPP to study RNA-protein interactions**

72 To prove the concept, we firstly selected dRfxCas13d and APEX2 for testing, because  
73 RfxCas13d is the smallest and most active one among Cas13 proteins<sup>[31]</sup> and APEX2 have the  
74 fastest rate of labeling<sup>[26]</sup>, which can be used for isolated analysis of RNA-protein interactions that  
75 occur over short time periods. We fused APEX2 to N-terminus or C-terminus of RfxCas13d to test  
76 whether the fusion of APEX2 affected the function of RfxCas13d by detecting knockdown  
77 efficiency of RfxCas13d (Figure 2A). Results showed that fusion of APEX2 to C-terminus of  
78 RfxCas13d only slightly affect the knockdown efficiency of RfxCas13d, and has no effect on the  
79 expression of RfxCas13d (Figure 2B). Therefore, we constructed dRfxCas13d-APEX2-NES  
80 plasmid (Figure 2A) and applied it to well-studied ACTB mRNA to test whether it would identify  
81 known RBPs of ACTB mRNA. We designed seven Rfx-crRNAs targeting different regions of  
82 ACTB mRNA and validated their targeting by knockdown with an active RfxCas13d. RT-qPCR  
83 results showed that all seven Rfx-crRNAs significantly reduced ACTB mRNA levels in HEK293T  
84 cells (Figure 2C). Then we transfected HEK293T with dRfxCas13d-APEX2-NES and two optimal

85 ACTB Rfx-crRNAs (crRNA4 and crRNA7) to test whether dRfxCas13d-APEX2-NES can be  
86 directed to ACTB mRNA under the guidance of ACTB Rfx-crRNAs. In addition, cells were  
87 treated with sodium arsenite to induce the formation of stress granules where ACTB mRNA  
88 accumulated. Results showed that dRfxCas13d-APEX2-NES could colocalize with the stress  
89 granule marker G3BP1 regardless of co-transfection with ACTB Rfx-crRNAs or non-targeting  
90 Rfx-crRNAs (Figure 2D). This indicated that dRfxCas13d-APEX2-NES may nonspecifically  
91 accumulate with ACTB mRNA. We also constructed dRfxCas13d-APEX2-NLS plasmid and  
92 designed the Rfx-crRNAs targeting NEAT1 to study paraspeckles. We found that the localization  
93 of dRfxCas13d-APEX2-NLS had no difference between the non-targeting crRNA group and the  
94 NEAT1 targeting crRNA group (data not show), which is consistent with results of Chen lab<sup>[34]</sup>.  
95 These data suggested that dRfxCas13d is not suitable for CBRPP to study RNA-protein  
96 interactions.

### 97 **Transient transfection of dPspCas13b-APEX2 to study RBPs of ACTB mRNA is** 98 **not effective**

99 Recent study showed that dPspCas13b is the most efficient dCas13 protein to label RNA<sup>[34]</sup>, so  
100 we replaced dRfxCas13d with dPspCas13b and added a flexible linker 3x(GGGGS) between  
101 dPspCas13b and APEX2 to avoid mutual influence (Figure 3A). Since PspCas13b and RfxCas13d  
102 cannot share the crRNAs, we redesigned four ACTB Psp-crRNAs and validated their targeting.  
103 Results showed that all four ACTB Psp-crRNAs significantly reduced ACTB mRNA levels in  
104 HEK293T cells, and that the knockdown efficiency and expression level were comparable  
105 between PspCas13b and PspCas13b-APEX2 (Figure 3B and 3C). Furthermore, co-transfection of  
106 dPspCas13b-APEX2 and ACTB Psp-crRNAs in HEK293T did not affect the mRNA and protein  
107 level of ACTB (Figure 3D), suggesting this system does not affect the stability and translation of  
108 ACTB mRNA. Then, we transiently transfected dPspCas13b-APEX2 and ACTB Psp-crRNAs into  
109 HEK293T cells to performed a 1-minute proximity labeling reaction, followed by streptavidin  
110 bead enrichment of biotinylated proteins and LC-MS (Figure 3E). The streptavidin-HRP blot  
111 showed that dPspCas13b-APEX2 has biotinylation activity (Figure 3F). Mass spectrometry  
112 profiling results showed that the known RBPs of ACTB mRNA (marked in red) were not enriched  
113 in the ACTB Psp-crRNA group relative to the non-targeting Psp-crRNA group (Figure 3G). These  
114 data suggested that transient transfection of dPspCas13b-APEX2 to study RBPs of ACTB mRNA  
115 is not effective.

116 We speculated that such results may be due to the high expression of dPspCas13b-APEX2 or  
117 the properties of APEX2 itself. If the protein expression level of dPspCas13b-APEX2 is too high,  
118 or the copy number of dPspCas13b-APEX2 proteins exceeds that of target RNAs, some redundant  
119 dPspCas13b-APEX2 proteins cannot be directed to the target RNAs with the guidance of specific  
120 crRNAs, so background proteins would be labeled, resulting in low signal-to-noise ratio. It's  
121 known that APEX2-based labeling is often specific to low-abundance amino acids such as  
122 tyrosine<sup>[35, 36]</sup>, so it is possible that labeling will not occur if surface-exposed tyrosine is not  
123 available.

### 124 **Inducible expression of dPspCas13b-BioID2 successfully identifies RBPs of**

## 125 **ACTB mRNA**

126 For further optimization, we next used other three PBL enzymes (BioID2, TurboID and BASU)  
127 to test which enzyme is optimal (Figure 4A). Simultaneously, we took advantage of the Tet-On 3G  
128 inducible expression system to keep the expression of fusion proteins at a low level in HEK293T  
129 cells (Supplementary Figure 1). RT-qPCR results showed that the knockdown efficiency of  
130 PspCas13b was not affected by fusion BioID2/TurboID/BASU/APEX2 to C terminus of  
131 PspCas13b (Figure 4B). Therefore, we constructed four stable HEK293T cell lines for inducible  
132 expression of dPspCas13b- BioID2/TurboID/BASU/Apex2. Western blotting results showed that  
133 all four stable cell lines can be induced by doxycycline in a dose-dependent manner, and that  
134 BioID2, TurboID and APEX2 have biotinylation activity but not BASU (Figure 4C). Subsequently,  
135 we used dPspCas13b-BioID2/TurboID/Apex2 inducibly expressing cell lines to identify the  
136 proteins interacting with ACTB mRNA (Figure 4D and 4E). We analyzed the protein mass  
137 spectrometry data obtained from these three cell lines, and found that in dPspCas13b-BioID2  
138 inducibly expressing cell line, the known RBPs of ACTB mRNA (marked in red) such as  
139 IGF2BP1, HNRNPA1, HNRNRC, HNRNPA2B1 and HNRNPM, were significantly enriched in  
140 ACTB Psp-crRNA group relative to the non-targeting Psp-crRNA group (Figure 4F and  
141 Supplementary Figure 2). IGF2BP1, also known as ZBP1 (zipcode-binding protein 1), interacts  
142 with the zipcode of ACTB mRNA via KH (HNRNPK homology) domains to regulate the  
143 localization and translation of ACTB mRNA<sup>[37]</sup>. HNRNPA1, HNRNPC, HNRNPA2B1 and  
144 HNRNPM are common RBPs that are involved not only in processing heterogeneous nuclear  
145 RNAs (hnRNAs) into mRNAs, but also mRNAs stability and translational regulation<sup>[38]</sup>. KHSRP  
146 have been suggested to be associated with ACTB mRNA localization<sup>[39]</sup>. These data indicated that  
147 inducible expression of dPspCas13b-BioID2 successfully identify RBPs of ACTB mRNA.

148 Unlike TurboID or APEX2, BioID2 used in CBRPP generates a history of RNA-protein  
149 interactions over time, which can capture some transient RNA-protein interactions, such as those  
150 occur during various stages of the cell cycle. Besides, the results obtained using BioID2 in CBRPP  
151 represent the accumulation of biotinylated proteins over the labeling time. The proteins that  
152 interact with the target RNA are labeled and accumulated during this time, and those background  
153 proteins that occasionally appear near the target RNA without mutual interaction may be labeled  
154 but not accumulated, which result in high signal-to-noise ratio. Therefore, inducible expression of  
155 dPspCas13b-BioID2 is recommended to study RBPs of the target RNA.

## 156 **Discussion**

157 Here we proposed a new RNA-centric method named CBRPP by combining dCas13 with  
158 proximity-based labeling. With some optimizations, we finally determined that inducible  
159 expression of dPspCas13b-BioID2 is most suitable for studying RNA-protein interactions. In the  
160 presence of a specific crRNA, the dPspCas13b-BioID2 fusion protein is directed to the target  
161 RNA, then BioID2 in the chimera biotinylates nearby proteins of the target RNA. With the strong  
162 interaction between biotin and streptavidin, biotinylated proteins can be easily enriched and  
163 identified.

164 Compared with previous RNA-centric methods, CBRPP has several advantages. First, CBRPP  
165 does not require pre-labeling of the target RNA<sup>[13]</sup>, MS2 insertion in advance<sup>[28]</sup>, or designing  
166 antisense probes<sup>[16-20]</sup> to purify RNA-protein complexes. In dPspCas13b-BioID2 positive cells  
167 only crRNAs are required. Second, using CBRPP, RBPs labeling is done in a living cell state  
168 without manipulating RNA-protein complexes in vitro, so it almost preserves the natural structure  
169 of the target RNA, while avoiding the possible disruption of RNA-protein interactions and RNA  
170 degradation. Third, CBRPP can capture weak and transient RNA-protein interactions, taking  
171 advantage of proximity-based labeling<sup>[22]</sup>.

172 As with any technology, CBRPP has its limitations. Since proximity-based labeling is in a  
173 distance-dependent manner, proteins identified by CBRPP may be not RBPs of the target RNA but  
174 merely proximate proteins. Therefore, it is necessary to confirm the interactions between the target  
175 RNA and candidate proteins identified by CBRPP with RIP or CLIP. Due to the large size of  
176 dPspCas13b-BioID2, its binding to the target RNA may affect the binding of the original  
177 interacted protein at this site. In addition, the long labeling time required for BioID2 methods  
178 prevents CBRPP from isolated analysis of RNA-protein interactions that occur over short period  
179 of time.

180 According to our experience, there are three crucial factors for the success of CBRPP. First, it is  
181 necessary to find potent crRNAs for analysis, and testing multiple crRNAs at the same time is  
182 recommended. Second, the expression level of dPspCas13b-BioID2 should be controlled at a low  
183 level in case the copy number of fusion proteins exceeds that of the target RNAs, resulting in low  
184 signal-to-noise ratio. Third, setting up an appropriate control group is very helpful for excluding  
185 background proteins identified by the experimental group.

186 In summary, in this study we developed an effective RNA centric method to identify proteins  
187 associated with the target RNA in native cellular context without cross-linking or RNA  
188 manipulation in vitro. Although we have only studied ACTB mRNA using CBRPP, in principle  
189 CBRPP can also be used to study lncRNA or other RNA types. For large lncRNA, taking Xist as  
190 an example, by designing different crRNAs target different regions of Xist, CBRPP can not only  
191 study the RBPs of Xist, but also the RBPs at a certain position of Xist<sup>[16,40]</sup>. Furthermore, CBRPP  
192 is suitable for studying the mechanism of diseases caused by abnormal RNA, such as myotonic  
193 dystrophy type 1<sup>[7]</sup>.

194

## 195 **Materials and Methods**

### 196 **Cell culture**

197 HEK293T (Human Embryonic Kidney 293T) cells was obtained from ATCC. Cells were  
198 cultured in DMEM medium supplemented with 10% FBS (Gibco) and 100U/ml  
199 Penicillin-Streptomycin in a humidified incubator at 37 °C with 5% CO<sub>2</sub>.

### 200 **Reagents and Antibodies**

201 PEI (764582, Sigma-Aldrich) was used for transfection. Antibodies used in this study include  
202 the following: anti-HA (rabbit, H6908, Sigma-Aldrich); anti-alpha-tubulin (rabbit, 11224-1-AP,  
203 Proteintech); anti-G3BP1 (mouse, sc-365338, Santa Cruz); HRP-conjugated Streptavidin  
204 (SA00001-0, Proteintech). The antibodies were diluted 1,000 times for immunoblots, 200 times in  
205 confocal microscopy.

### 206 **Plasmid constructs**

207 Expression constructs generated for this study were prepared by standard molecular biology  
208 techniques and coding sequences entirely verified. All the mutants were constructed by standard  
209 molecular biology technique. Each mutant was confirmed by sequencing. All plasmid constructs  
210 and their sequence were listed in Supplementary Table 1. All crRNAs used in this paper were  
211 listed in Supplementary Table 2.

### 212 **Western blotting**

213 Cells were washed with PBS and lysed by incubation on ice for 10 min with RIPA lysis buffer  
214 (50 mM Tris, 150 mM NaCl, 0.1% SDS, 0.5% sodium deoxycholate, 1% Triton X-100, protease  
215 cocktail [C0001, Targetmol], and 1 mM PMSF). The proteins were resolved by SDS/PAGE and  
216 transferred to 0.22 um nitrocellulose membrane (PALL), which then was incubated overnight with  
217 primary antibodies. The membrane was further incubated with the corresponding HRP-conjugated  
218 secondary antibodies and detected by enhanced chemiluminescence.

### 219 **Immunofluorescence microscopy**

220 HEK293T cells were plated and grew on coverslips with indicated treatments, washed with  
221 pre-warmed PBS, and fixed with 4% paraformaldehyde for 10 min. The cells were permeated with  
222 0.5% Triton-100 for 3 min, blocked with 3% BSA for 30 min, washed, and incubated with primary  
223 antibodies for 1 h at 37 °C. After washing, cells were stained with Alexa Fluor 488-conjugated  
224 secondary antibodies (A11029, Invitrogen) or Alexa Fluor 555-conjugated secondary antibodies  
225 (A-21428, Invitrogen) for 1 h at 37 °C, and then with DAPI (4',6-Diamidino-2-phenylindole,  
226 Roche) for 15 min. The coverslips were washed extensively and mounted onto slides. Imaging of  
227 the cells were carried out using N-STORM5.0 microscope.



## 228 **RNA Extraction and Quantitative reverse transcription PCR (RT-qPCR)**

229 Total RNA from cells were isolated using the RNA simple Total RNA kit (TIANGEN). 1ug  
230 RNA was reverse transcribed using a FastKing RT Kit (TIANGEN). Levels of the indicated genes  
231 were analyzed by quantitative real-time PCR amplified using SYBR Green (Q311, Vazyme). All  
232 primers were listed in Supplementary Table 3.

## 233 **Generation of Stable Expression Mammalian Cell Lines**

234 For preparation of lentiviruses, HEK293T cells in 6-well plates were transfected with the  
235 lentiviral vector of interest (1,800 ng), the lentiviral packaging plasmids psPAX2 (600 ng) and  
236 pMD2.G (600 ng) and 12 ul of PEI (1mg/ml). About 48 h after transfection the cell medium  
237 containing lentiviruses was centrifugalized at 12,000 g for 3 minutes and the supernatant was  
238 harvested. HEK293 cells were then infected at ~50% confluency by lentiviruses for 48 h, followed  
239 by selection with 1 µg/ml puromycin in growth medium for 7 days. The stable transgene  
240 monoclonal cells were harvested by limiting dilution in cell pools.

## 241 **Generation of Tetracycline (Tet) Inducible Expression HEK293T cell lines**

242 The two consecutive manipulation steps are necessary to generate human Tet-on cell lines with  
243 inducible expression of plasmids of interest. The first step is generation of cells stably expressing  
244 reverse tetracycline-controlled transactivator (rtTA). HEK293T cells were infected at ~50%  
245 confluency by lentiviruses containing pLVX-TetO3G(rtTA)-hygr vector for 48 h, followed by  
246 selection with 50 ug/ml hygromycin in growth medium for 7 days, and hygromycin resistant  
247 clones were selected. Several clones were picked and tested for rtTA expression by  
248 immunoblotting. After testing for all molecular and cell biological parameters of interest, the 'best'  
249 rtTA-positive clone was expanded and stored. The next step is generation of Tet-on cell lines with  
250 inducible expression of target plasmids. The 'best' rtTA-positive clone was infected by lentiviruses  
251 containing target plasmids (Inducible-dPspCas13b-BioID2/BASU/TurboID/APEX2) for 48 h,  
252 followed by selection with 1 µg/ml puromycin in growth medium for 7 days. The puromycin  
253 resistant clones were harvested by limiting dilution in cell pools. Several individual cell clones  
254 were picked, expanded and screened by immunoblotting for Doxycycline-inducible expression of  
255 the gene of interest. Finally, clones of interest were expanded, re-tested and stored.

## 256 **Biotin Labeling in Live Cells**

257 For dPspCas13b-APEX2 transient transfection experiments, HEK293T cells were plated in 10  
258 cm dish at 70% confluency 18 hours prior to transfection. Cells were transfected with the  
259 dPspCas13b-Apex2 plasmid and the crRNA plasmids. After 6 hours of transfection, the culture  
260 medium was changed. After 24 hours of transfection, biotin-phenol was added to cell culture  
261 medium to a final concentration of 500 uM for 30 minutes, H<sub>2</sub>O<sub>2</sub> was then added into cell culture  
262 media at a final concentration of 1mM to induce biotinylation. After gently shaking the cell culture  
263 dish for one minute, the medium was removed and cells were washed three times with PBS  
264 supplemented with 100mM sodium azide, 100mM sodium ascorbate and 50mM TROLOX. Cells

265 were scraped and transferred to 1.5 ml tubes with ice cold PBS, spun at 3600 rpm for 5 minutes,  
266 flash frozen in liquid nitrogen and stored at -80°C.

267 For inducibly expressing dPspCas13b-BioID2/TurboID/BASU/Apex2 experiments, four stable  
268 HEK293T cell lines for inducible expression of dPspCas13b- BioID2/TurboID/BASU/Apex2  
269 were plated in 10 cm dish at 70% confluency 18 hours prior to transfection. Cells were transfected  
270 with 20ug crRNA plasmid per dish. After 6 hours of transfection, the culture medium was replaced  
271 with new media containing 0.1 ug/ml doxycycline. For BioID2, biotin was added to the culture  
272 medium at a final concentration of 50 uM after 15 hours of transfection; for TurboID, biotin was  
273 added at a final concentration of 500uM for 10 minutes before harvesting cells; for BASU, biotin  
274 was added at a final concentration of 200uM for 2 hours before harvesting cells; for APEX2,  
275 biotin-phenol was added at a final concentration of 500 uM for 30 minutes and H<sub>2</sub>O<sub>2</sub> was added at  
276 a final concentration of 1 mM for one minute before harvesting cells. All kinds of cells were  
277 harvested at 33 hours after transfection. For APEX2, the medium was removed and cells were  
278 washed three times with ice cold PBS supplemented with 100 mM sodium azide, 100mM sodium  
279 ascorbate and 50mM TROLOX; for TurboID/BASU/BioID2, the medium was removed and cells  
280 were washed three times with ice cold PBS. Cells were scraped and transferred to 1.5 ml tubes  
281 with ice cold PBS, spun at 3600 rpm for 5 minutes, flash frozen in liquid nitrogen and stored at  
282 -80°C.

### 283 **Streptavidin Magnetic Bead Enrichment of Biotinylated Proteins**

284 Cell pellets as described above were lysed in RIPA lysis buffer (50 mM Tris, 150 mM NaCl, 0.1%  
285 SDS, 0.5% sodium deoxycholate, 1% Triton X-100, protease cocktail [TargetMol], and 1 mM  
286 PMSF) at 4°C for 10 minutes. The lysates were cleared by centrifugation at 12,000 g for 10 min at  
287 4 °C. 50ul of each lysate supernatant was reserved for detection of biotinylation activity by  
288 western blotting. Streptavidin magnetic beads were washed twice with RIPA lysis buffer and then  
289 mixed with lysates supernatant together with rotation overnight at 4 °C. On day 2, the beads were  
290 subsequently washed twice with 1 mL of RIPA lysis buffer, once with 1 mL of 1 M KCl, once with  
291 1 mL of 0.1 M Na<sub>2</sub>CO<sub>3</sub>, once with 1 mL of 2 M urea in 10 mM Tris-HCl (pH 8.0), and twice with  
292 1 mL RIPA lysis buffer. Finally, biotinylated proteins were eluted by boiling the beads in 150 µL  
293 of elution buffer (55 mM pH 8.0 Tris-HCl, 0.1% SDS, 6.66mM DTT, 0.66 mM biotin) for 10  
294 minutes and sent for mass spectrometry.

### 295 **Statistical Analysis**

296 The descriptive statistical analysis was performed with Prism version 7 (GraphPad Software).  
297 All data are presented as mean ± SD. A two-tailed Student's t test assuming equal variants was  
298 used to compare two groups. In all figures, the statistical significance between the indicated  
299 samples and control is designated as \*P < 0.05, \*\*P < 0.01, \*\*\*P < 0.001, or NS (P > 0.05).

300

301 **Acknowledgments**

302 This work was supported by the National Natural Science Foundation of China (31570891) and  
303 the National Key Research and Development Program of China (Grant #2016YFA0500302).

304 **Author Contributions**

305 Y.L. and F.Y. conceived this project. Y.L. analyzed the data and wrote the paper. Y.L., SD.L., L.C.,  
306 H.D. and F.Y. revised the paper. Y.L., SD.L., L.C. and YJ.L. performed most experiments. SJ.L.  
307 contributed to imaging.

308 **Declaration of Interests**

309 The authors declare no competing interests.

310

## 311 Reference

- 312 1. Lee SR, Lykke-Andersen J. **Emerging roles for ribonucleoprotein modification and remodeling**  
313 **in controlling RNA fate.** *Trends Cell Biol* 2013; 23(10):504-510.
- 314 2. Muller-McNicoll M, Neugebauer KM. **How cells get the message: dynamic assembly and**  
315 **function of mRNA-protein complexes.** *Nat Rev Genet* 2013; 14(4):275-287.
- 316 3. Gerstberger S, Hafner M, Tuschl T. **A census of human RNA-binding proteins.** *Nat Rev Genet*  
317 2014; 15(12):829-845.
- 318 4. Di Liegro CM, Schiera G, Di Liegro I. **Regulation of mRNA transport, localization and**  
319 **translation in the nervous system of mammals (Review).** *Int J Mol Med* 2014; 33(4):747-762.
- 320 5. Bugaut A, Balasubramanian S. **5'-UTR RNA G-quadruplexes: translation regulation and**  
321 **targeting.** *Nucleic Acids Res* 2012; 40(11):4727-4741.
- 322 6. Ma W, Mayr C. **A Membraneless Organelle Associated with the Endoplasmic Reticulum**  
323 **Enables 3'UTR-Mediated Protein-Protein Interactions.** *Cell* 2018; 175(6):1492-1506 e1419.
- 324 7. Jain A, Vale RD. **RNA phase transitions in repeat expansion disorders.** *Nature* 2017;  
325 546(7657):243-247.
- 326 8. Baltz AG, Munschauer M, Schwanhauser B, Vasile A, Murakawa Y, Schueler M, et al. **The**  
327 **mRNA-bound proteome and its global occupancy profile on protein-coding transcripts.** *Mol Cell*  
328 2012; 46(5):674-690.
- 329 9. Castello A, Fischer B, Eichelbaum K, Horos R, Beckmann BM, Strein C, et al. **Insights into RNA**  
330 **biology from an atlas of mammalian mRNA-binding proteins.** *Cell* 2012; 149(6):1393-1406.
- 331 10. Ramanathan M, Porter DF, Khavari PA. **Methods to study RNA-protein interactions.** *Nat*  
332 *Methods* 2019; 16(3):225-234.
- 333 11. Licatalosi DD, Mele A, Fak JJ, Ule J, Kayikci M, Chi SW, et al. **HITS-CLIP yields genome-wide**  
334 **insights into brain alternative RNA processing.** *Nature* 2008; 456(7221):464-469.
- 335 12. Nicholson CO, Friedersdorf M, Keene JD. **Quantifying RNA binding sites transcriptome-wide**  
336 **using DO-RIP-seq.** *RNA* 2017; 23(1):32-46.
- 337 13. Zheng X, Cho S, Moon H, Loh TJ, Jang HN, Shen H. **Detecting RNA-Protein Interaction Using**  
338 **End-Labeled Biotinylated RNA Oligonucleotides and Immunoblotting.** *Methods Mol Biol* 2016;  
339 1421:35-44.
- 340 14. Zeng F, Peritz T, Kannanayakal TJ, Kilk K, Eiriksdottir E, Langel U, et al. **A protocol for PAIR:**  
341 **PNA-assisted identification of RNA binding proteins in living cells.** *Nat Protoc* 2006; 1(2):920-927.
- 342 15. Leppek K, Stoecklin G. **An optimized streptavidin-binding RNA aptamer for purification of**  
343 **ribonucleoprotein complexes identifies novel ARE-binding proteins.** *Nucleic Acids Res* 2014;  
344 42(2):e13.
- 345 16. Simon MD, Wang CI, Kharchenko PV, West JA, Chapman BA, Alekseyenko AA, et al. **The**  
346 **genomic binding sites of a noncoding RNA.** *Proc Natl Acad Sci U S A* 2011; 108(51):20497-20502.
- 347 17. Chu C, Qu K, Zhong FL, Artandi SE, Chang HY. **Genomic maps of long noncoding RNA**  
348 **occupancy reveal principles of RNA-chromatin interactions.** *Mol Cell* 2011; 44(4):667-678.
- 349 18. Matia-Gonzalez AM, Iadevaia V, Gerber AP. **A versatile tandem RNA isolation procedure to**  
350 **capture in vivo formed mRNA-protein complexes.** *Methods* 2017; 118-119:93-100.
- 351 19. McHugh CA, Guttman M. **RAP-MS: A Method to Identify Proteins that Interact Directly with**  
352 **a Specific RNA Molecule in Cells.** *Methods Mol Biol* 2018; 1649:473-488.

- 353 20. West JA, Davis CP, Sunwoo H, Simon MD, Sadreyev RI, Wang PI, et al. **The long noncoding**  
354 **RNAs NEAT1 and MALAT1 bind active chromatin sites.** *Mol Cell* 2014; 55(5):791-802.
- 355 21. Terns MP. **CRISPR-Based Technologies: Impact of RNA-Targeting Systems.** *Mol Cell* 2018;  
356 72(3):404-412.
- 357 22. Kim DI, Roux KJ. **Filling the Void: Proximity-Based Labeling of Proteins in Living Cells.**  
358 *Trends Cell Biol* 2016; 26(11):804-817.
- 359 23. Trinkle-Mulcahy L. **Recent advances in proximity-based labeling methods for interactome**  
360 **mapping.** *F1000Res* 2019; 8.
- 361 24. Kim DI, Jensen SC, Noble KA, Kc B, Roux KH, Motamedchaboki K, et al. **An improved smaller**  
362 **biotin ligase for BioID proximity labeling.** *Mol Biol Cell* 2016; 27(8):1188-1196.
- 363 25. Branon TC, Bosch JA, Sanchez AD, Udeshi ND, Svinkina T, Carr SA, et al. **Efficient proximity**  
364 **labeling in living cells and organisms with TurboID.** *Nat Biotechnol* 2018; 36(9):880-887.
- 365 26. Lam SS, Martell JD, Kamer KJ, Deerinck TJ, Ellisman MH, Mootha VK, et al. **Directed evolution**  
366 **of APEX2 for electron microscopy and proximity labeling.** *Nat Methods* 2015; 12(1):51-54.
- 367 27. Ramanathan M, Majzoub K, Rao DS, Neela PH, Zarnegar BJ, Mondal S, et al. **RNA-protein**  
368 **interaction detection in living cells.** *Nat Methods* 2018; 15(3):207-212.
- 369 28. Mukherjee J, Hermesh O, Eliscovich C, Nalpas N, Franz-Wachtel M, Macek B, et al. **beta-Actin**  
370 **mRNA interactome mapping by proximity biotinylation.** *Proc Natl Acad Sci U S A* 2019;  
371 116(26):12863-12872.
- 372 29. Abudayyeh OO, Gootenberg JS, Essletzbichler P, Han S, Joung J, Belanto JJ, et al. **RNA targeting**  
373 **with CRISPR-Cas13.** *Nature* 2017; 550(7675):280-284.
- 374 30. Cox DBT, Gootenberg JS, Abudayyeh OO, Franklin B, Kellner MJ, Joung J, et al. **RNA editing**  
375 **with CRISPR-Cas13.** *Science* 2017; 358(6366):1019-1027.
- 376 31. Konermann S, Lotfy P, Brideau NJ, Oki J, Shokhirev MN, Hsu PD. **Transcriptome Engineering**  
377 **with RNA-Targeting Type VI-D CRISPR Effectors.** *Cell* 2018; 173(3):665-676 e614.
- 378 32. Myers SA, Wright J, Peckner R, Kalish BT, Zhang F, Carr SA. **Discovery of proteins associated**  
379 **with a predefined genomic locus via dCas9-APEX-mediated proximity labeling.** *Nat Methods* 2018;  
380 15(6):437-439.
- 381 33. Gao XD, Tu LC, Mir A, Rodriguez T, Ding Y, Leszyk J, et al. **C-BERST: defining subnuclear**  
382 **proteomic landscapes at genomic elements with dCas9-APEX2.** *Nat Methods* 2018; 15(6):433-436.
- 383 34. Yang LZ, Wang Y, Li SQ, Yao RW, Luan PF, Wu H, et al. **Dynamic Imaging of RNA in Living**  
384 **Cells by CRISPR-Cas13 Systems.** *Mol Cell* 2019; 76(6):981-997 e987.
- 385 35. Echols N, Harrison P, Balasubramanian S, Luscombe NM, Bertone P, Zhang Z, et al. **Comprehensive analysis of amino acid and nucleotide composition in eukaryotic genomes, comparing genes and pseudogenes.** *Nucleic Acids Res* 2002; 30(11):2515-2523.
- 386 36. Tourasse NJ, Li WH. **Selective constraints, amino acid composition, and the rate of protein**  
387 **evolution.** *Mol Biol Evol* 2000; 17(4):656-664.
- 388 37. Chao JA, Patskovsky Y, Patel V, Levy M, Almo SC, Singer RH. **ZBP1 recognition of beta-actin**  
389 **zipcode induces RNA looping.** *Genes Dev* 2010; 24(2):148-158.
- 390 38. Geuens T, Bouhy D, Timmerman V. **The hnRNP family: insights into their role in health and**  
391 **disease.** *Hum Genet* 2016; 135(8):851-867.
- 392 39. Pan F, Huttelmaier S, Singer RH, Gu W. **ZBP2 facilitates binding of ZBP1 to beta-actin mRNA**  
393 **during transcription.** *Mol Cell Biol* 2007; 27(23):8340-8351.
- 394 40. Chu C, Zhang QC, da Rocha ST, Flynn RA, Bharadwaj M, Calabrese JM, et al. **Systematic**  
395 **mapping of RNA-protein interactions in living cells.** *Nat Methods* 2018; 15(12):1253-1261.
- 396

397 **discovery of Xist RNA binding proteins.** *Cell* 2015; 161(2):404-416.

398

399

## 400 **Figure legends**

### 401 **Figure 1. Design of CBRPP**

402 (A) Schematic representation of CBRPP approach. By fusing dCas13 and PBL enzyme together,  
403 dCas13, under the guidance of a specific crRNA, acts as an RNA tracker to bring PBL enzyme to  
404 the target RNA, then PBL enzyme biotinylates surrounding proteins of the target RNA, followed  
405 by streptavidin beads enrichment of biotinylated proteins and mass spectrometry.

### 406 **Figure 2. dRfxCas13d is not suitable for CBRPP to study RNA-protein** 407 **interactions**

408 (A) Plasmids used in this figure. NLS: nuclear localization sequence; NES: nuclear export  
409 sequence; EGFP: enhanced green fluorescent protein; T2A: T2A self-cleaving peptide; HA:  
410 hemagglutinin tag.

411 (B) Upper: HEK293T cells were co-transfected with  
412 RfxCas13d/RfxCas13d-APEX2/APEX2-RfxCas13d and B4GALNT1 Rfx-crRNA to detect the  
413 mRNA level of B4GALNT1 by RT-qPCR after 48 hours. Rfx-NT1: non-targeting Rfx-crRNA 1;  
414 Rfx-NT2: non-targeting Rfx-crRNA 2. B4-Rfx-crRNA: B4GALNT1 Rfx-crRNA. Bottom:  
415 western blotting to measure the protein expression level of RfxCas13d, APEX2-RfxCas13d and  
416 RfxCas13d-APEX2.

417 (C) HEK293T cells were co-transfected with RfxCas13d and ACTB Rfx-crRNAs to detect the  
418 mRNA level of ACTB by RT-qPCR after 48 hours.

419 (D) Representative images for dRfxCas13d-APEX2 imaging with two crRNAs targeting ACTB  
420 mRNA in HEK293T. Mock: no treatment. Sodium arsenite: treating cells with 0.5mM sodium  
421 arsenite for 30 minutes. Stress granules are indicated by G3BP1 staining. Scale bars, 10  $\mu$ m.

### 422 **Figure 3. Transient transfection of dPspCas13b-APEX2 to identify RBPs of** 423 **ACTB mRNA**

424 (A) Plasmids used in this figure. P2A: T2A self-cleaving peptide; Linker: 3x(GGGGS), G: glycine,  
425 S: serine.

426 (B) HEK293T cells were co-transfected with PspCas13b/PspCas13b-APEX2 and ACTB  
427 Psp-crRNAs to detect the mRNA level of ACTB after 48 hours. Psp-NT1: non-targeting  
428 Psp-crRNA 1; Psp-NT2: non-targeting Psp-crRNA 2.

429 (C) Western blotting to measure the protein expression level of PspCas13b and  
430 PspCas13b-APEX2.

431 (D) HEK293T cells were co-transfected with dPspCas13b-APEX2-NES and different ACTB  
432 Psp-crRNAs. Upper: RT-qPCR analysis of ACTB mRNA level in cells. Bottom: western blotting  
433 to measure the protein expression level of ACTB in cells.

434 (E) Workflow of transiently transfected dPspCas13b-APEX2 to capture the proteins that interact  
435 with ACTB mRNA in HEK293T. Psp-NT1-2: non-targeting Psp-crRNA 1 and non-targeting  
436 Psp-crRNA 2; ACTB-Psp-crRNA3-4: ACTB Psp-crRNA 3 and ACTB Psp-crRNA 4.

437 (F) Western blotting to detect the biotinylation activity of HEK293T cells co-transfected with  
438 dPspCas13b-APEX2-NES and different Psp-crRNAs.

439 (G) Scatter plot showing the number of peptides per protein after log<sub>2</sub> transformation in  
440 non-targeting Psp-crRNA group (X-axis) and ACTB Psp-crRNA group (Y-axis) from mass  
441 spectrometry proteomics data. The red dots in the scatter plot represent known RBPs of ACTB  
442 mRNA in StarBase v2.0 database. The experiments were done in HEK293T transiently transfected  
443 with dPspCas13b-APEX2 and Psp-crRNAs.

444 **Figure 4. Using dPspCas13b-BioID2/TurboID/APEX2 inducibly expressing cell**  
445 **lines to identify RBPs of ACTB mRNA**

446 (A) Plasmids used in this figure.

447 (B) HEK293T cells were co-transfected with PspCas13b or  
448 PspCas13b-APEX2/BASU/BioID2/TurboID and ACTB Psp-crRNAs to detect the mRNA level of  
449 ACTB after 48 hours.

450 (C) Western blotting to test the inducible ability and the biotinylation activity of four stable  
451 HEK293T cell lines for inducible expression of dPspCas13b-BioID2/TurboID/BASU/Apex2. Dox:  
452 doxycycline.

453 (D) Timeline to capture the proteins that interact with ACTB mRNA using  
454 dPspCas13b-BioID2/TurboID/Apex2 inducibly expressing cell lines.

455 (E) Western blotting to detect the expression level and biotinylation activity of cells collected from  
456 (D).

457 (F) Scatter plot showing the number of peptides per protein after log<sub>2</sub> transformation in  
458 non-targeting Psp-crRNA group (X-axis) and ACTB Psp-crRNA group (Y-axis) from mass  
459 spectrometry proteomics data. The red dots in the scatter plot represent known RBPs of ACTB  
460 mRNA in StarBase v2.0 database. The experiments were done in dPspCas13b-BioID2 inducibly  
461 expressing cell line.

462



463 **Table legends**

464 **Table 1. plasmids used in this paper**

465 **Table 2. crRNAs used in this paper**

466 **Table 3. qPCR primers used in this paper**

467

## 468 **Supplementary figure legends**

### 469 **Supplementary Figure 1**

470 (A) Work model of Tet-On 3G inducible expression system. Doxycycline binds the rtTA  
471 transcription factor and allows it to bind DNA at the promoter. Gene expression is induced in the  
472 presence of doxycycline. Reverse tetracycline-controlled transactivator (rtTA) is created by fusing  
473 reverse Tet repressor (rTetR) with VP16. TRE: Tet response element. Dox: doxycycline, a analog  
474 of tetracycline.

### 475 **Supplementary Figure 2**

476 Scatter plot showing the number of peptides per protein after log2 transformation in non-targeting  
477 Psp-crRNA group (X-axis) and ACTB Psp-crRNA group (Y-axis) from mass spectrometry  
478 proteomics data. The red dots in the scatter plot represent known RBPs of ACTB mRNA in  
479 StarBase v2.0 database.

480 (A) The experiments were done in dPspCas13b-APEX2 inducibly expressing cell line.

481 (B) The experiments were done in dPspCas13b-TurboID inducibly expressing cell line.

A

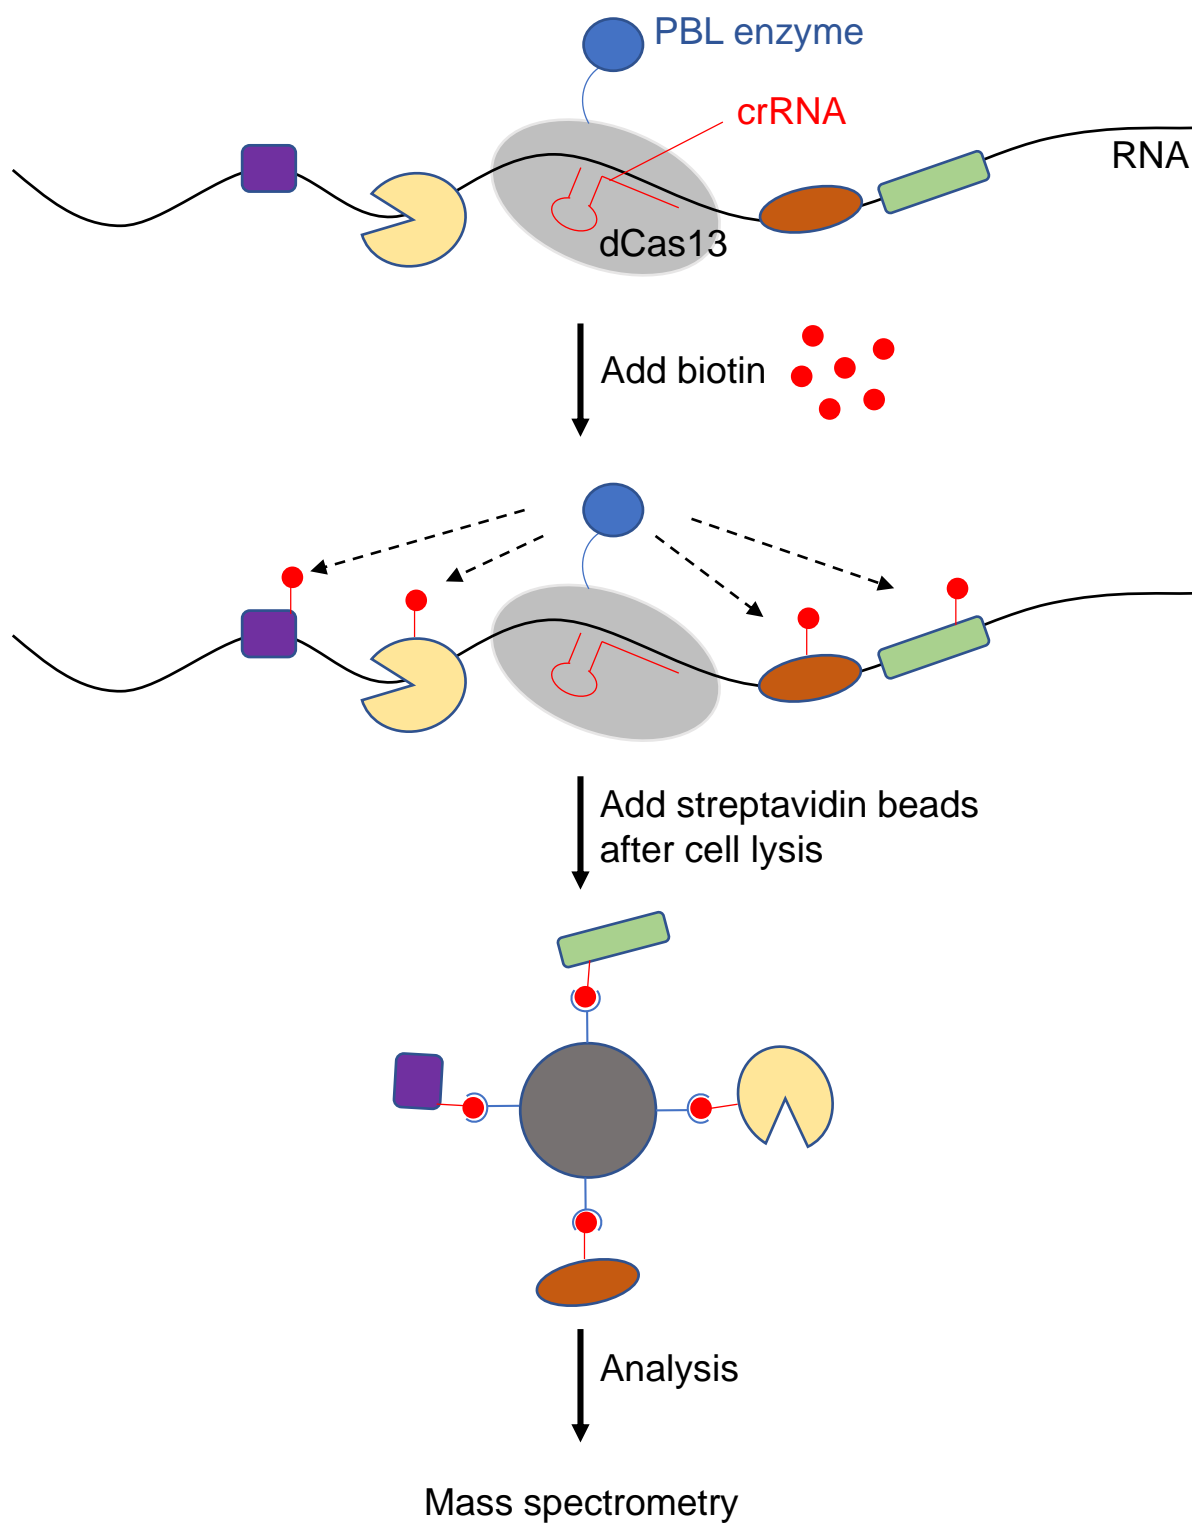

Figure 1. Design of CBRPP

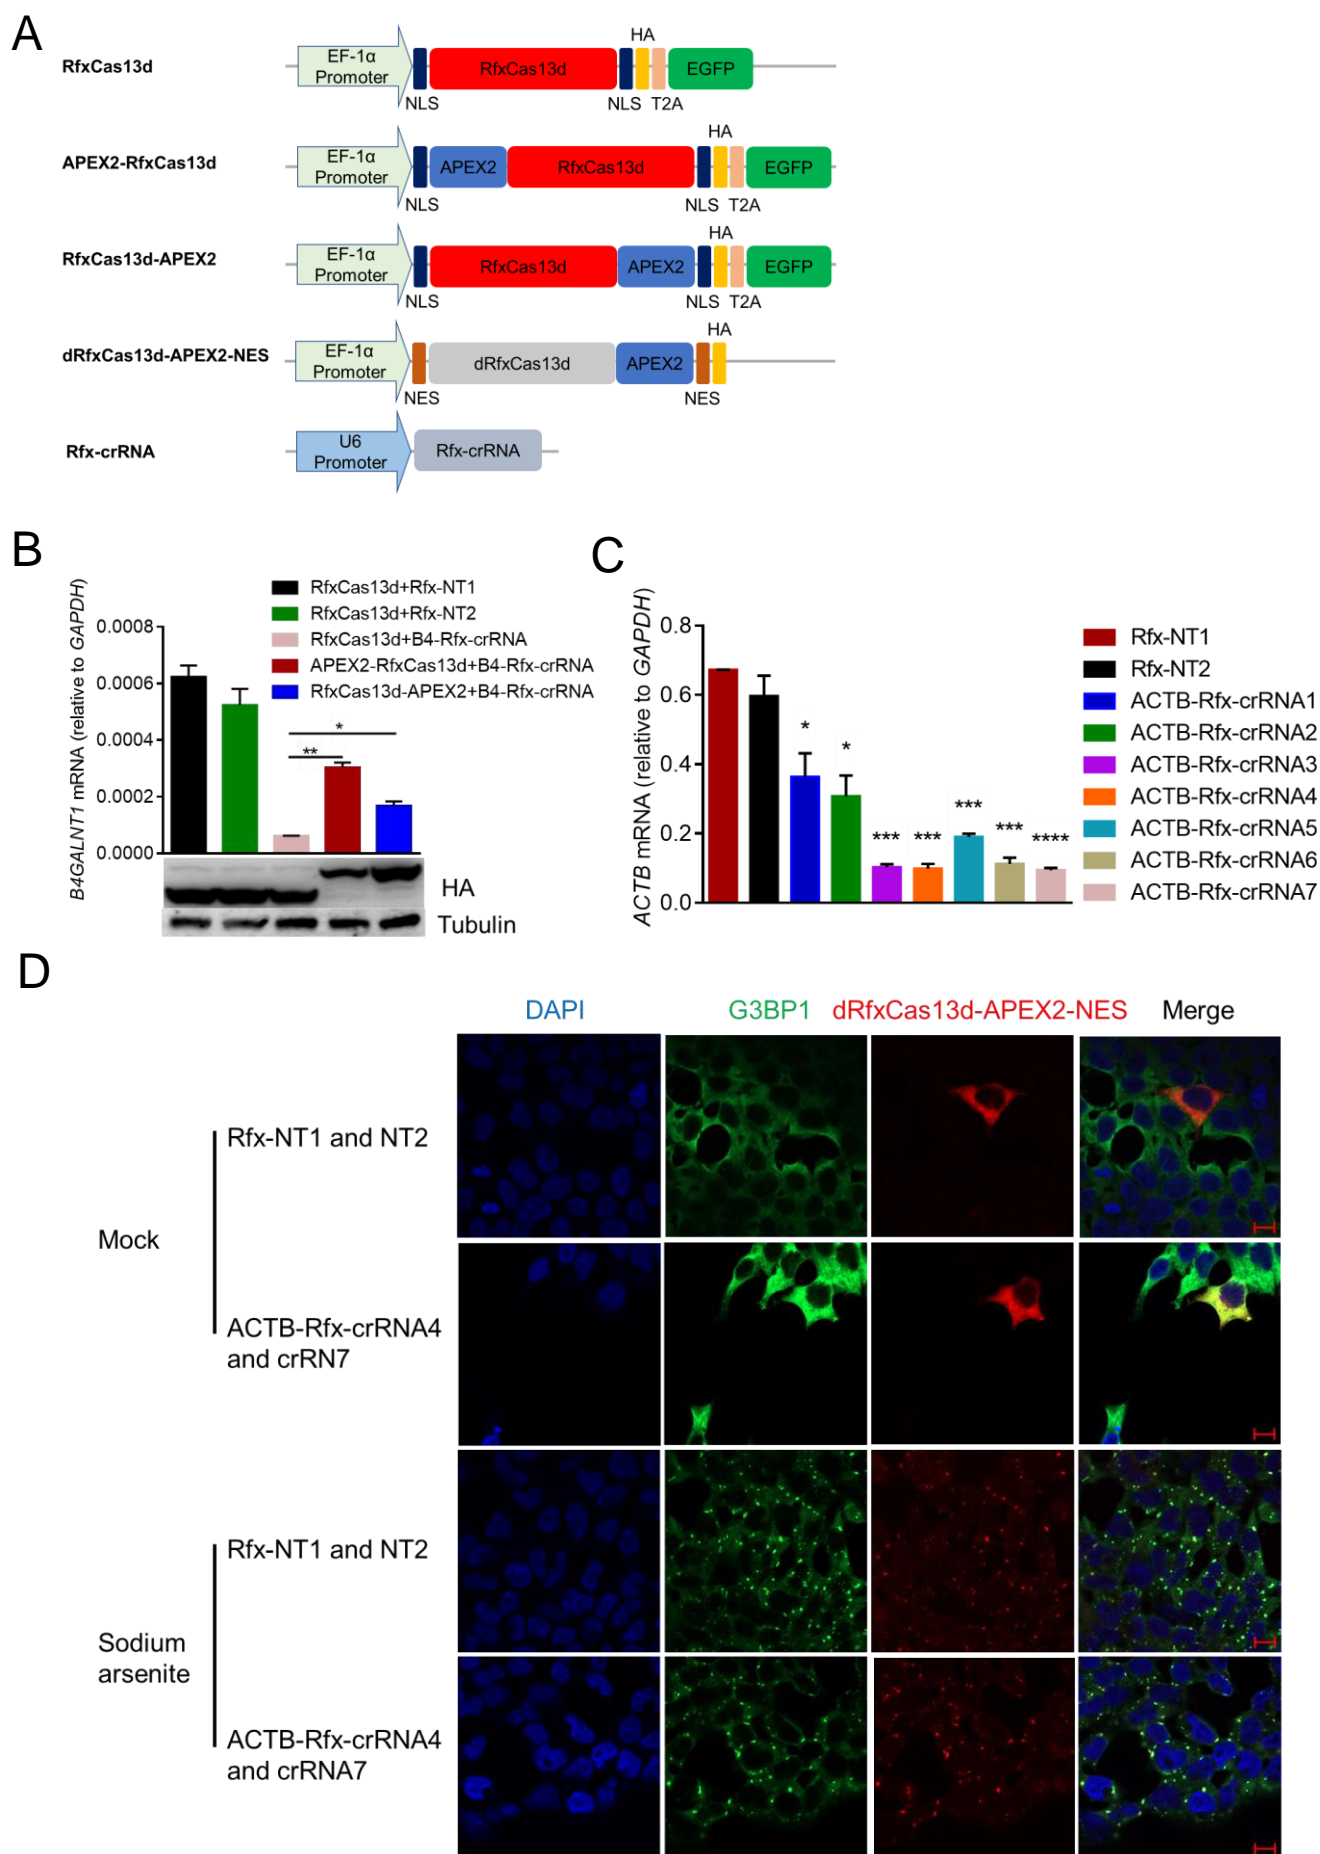

Figure 2. dRfxCas13d is not suitable for CBRPP to study RNA-protein interactions

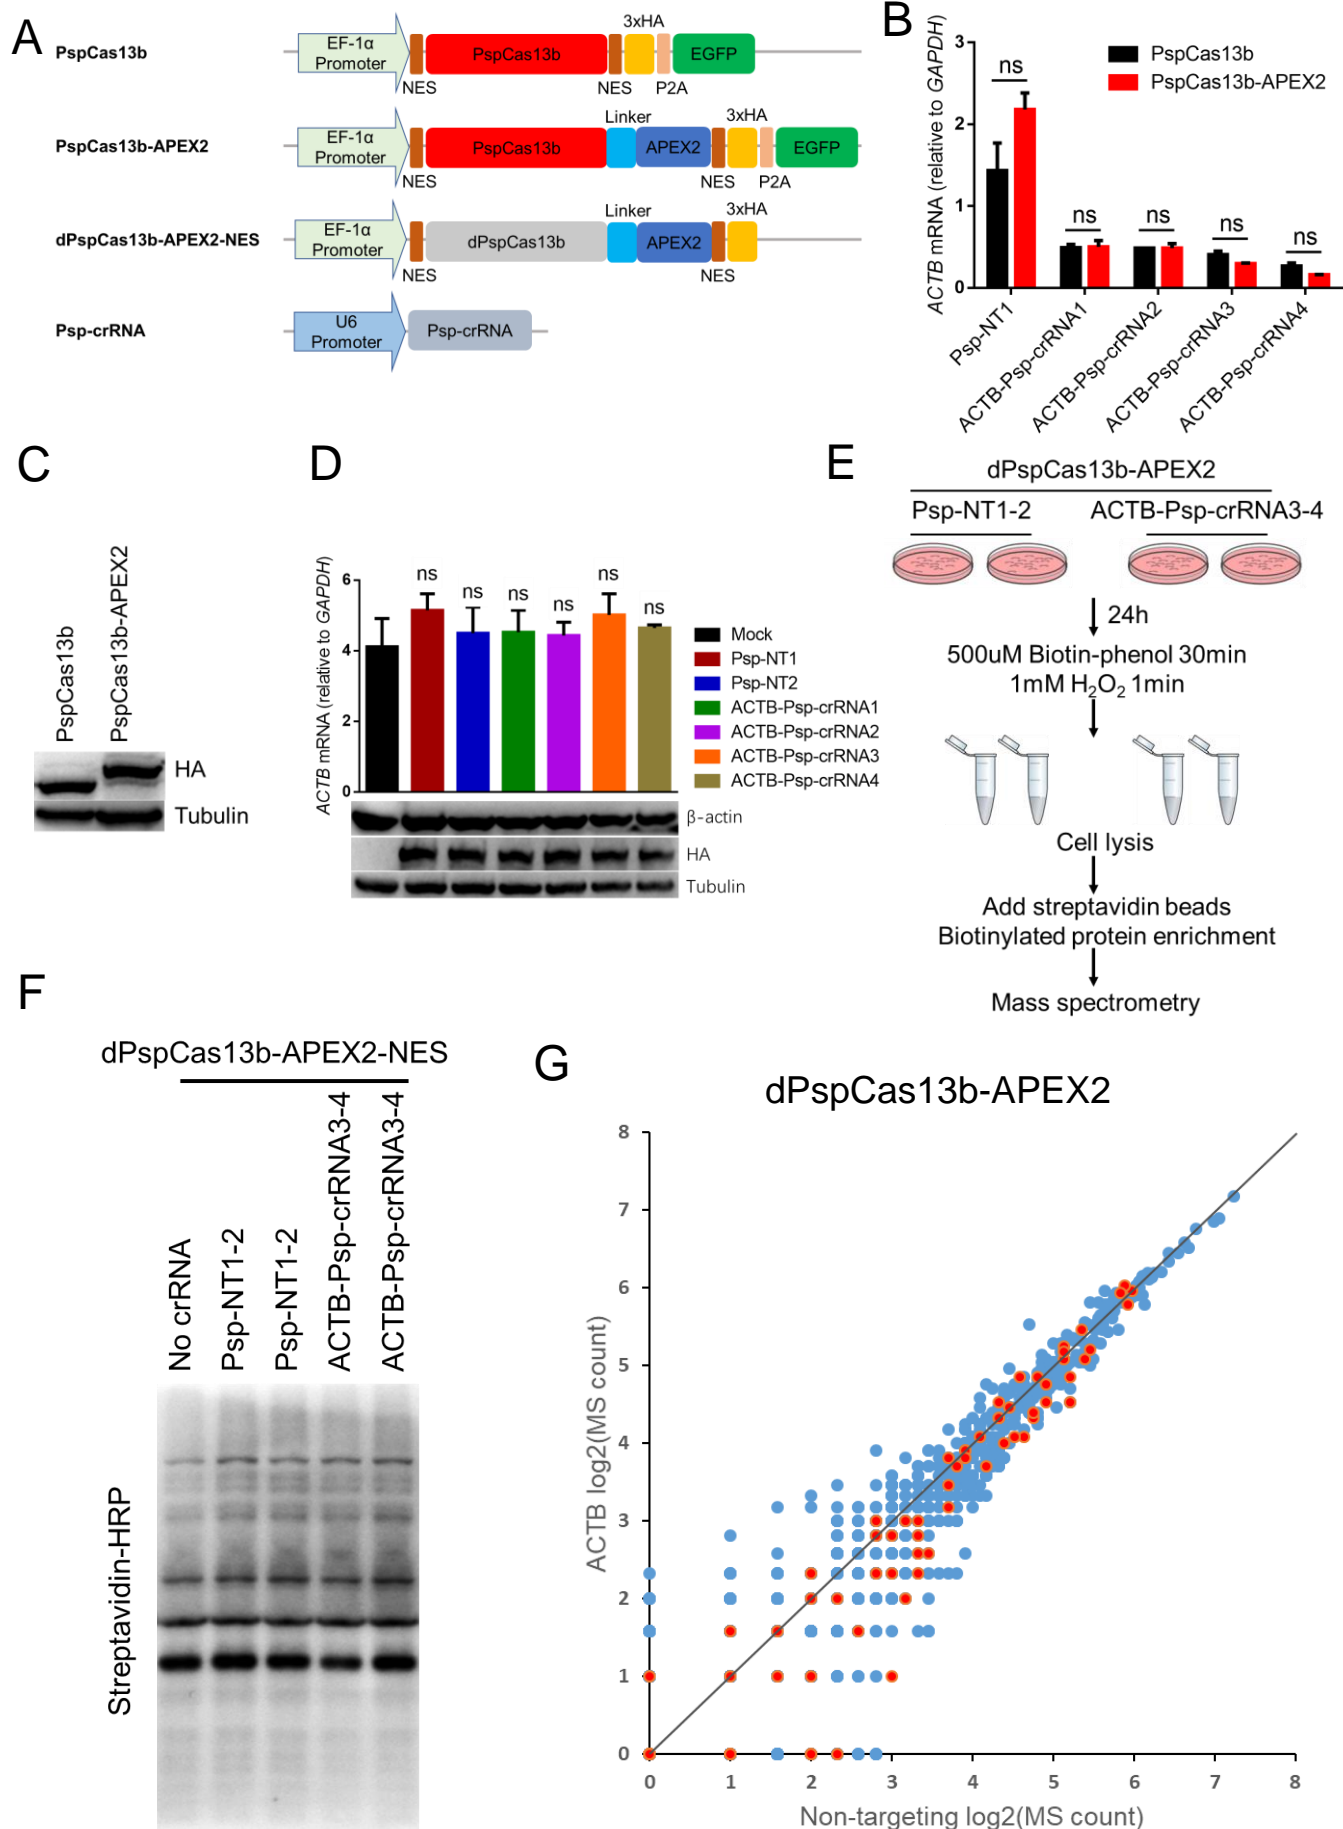

Figure 3. Transient transfection of dPspCas13b-APEX2 to identify RBPs of ACTB mRNA

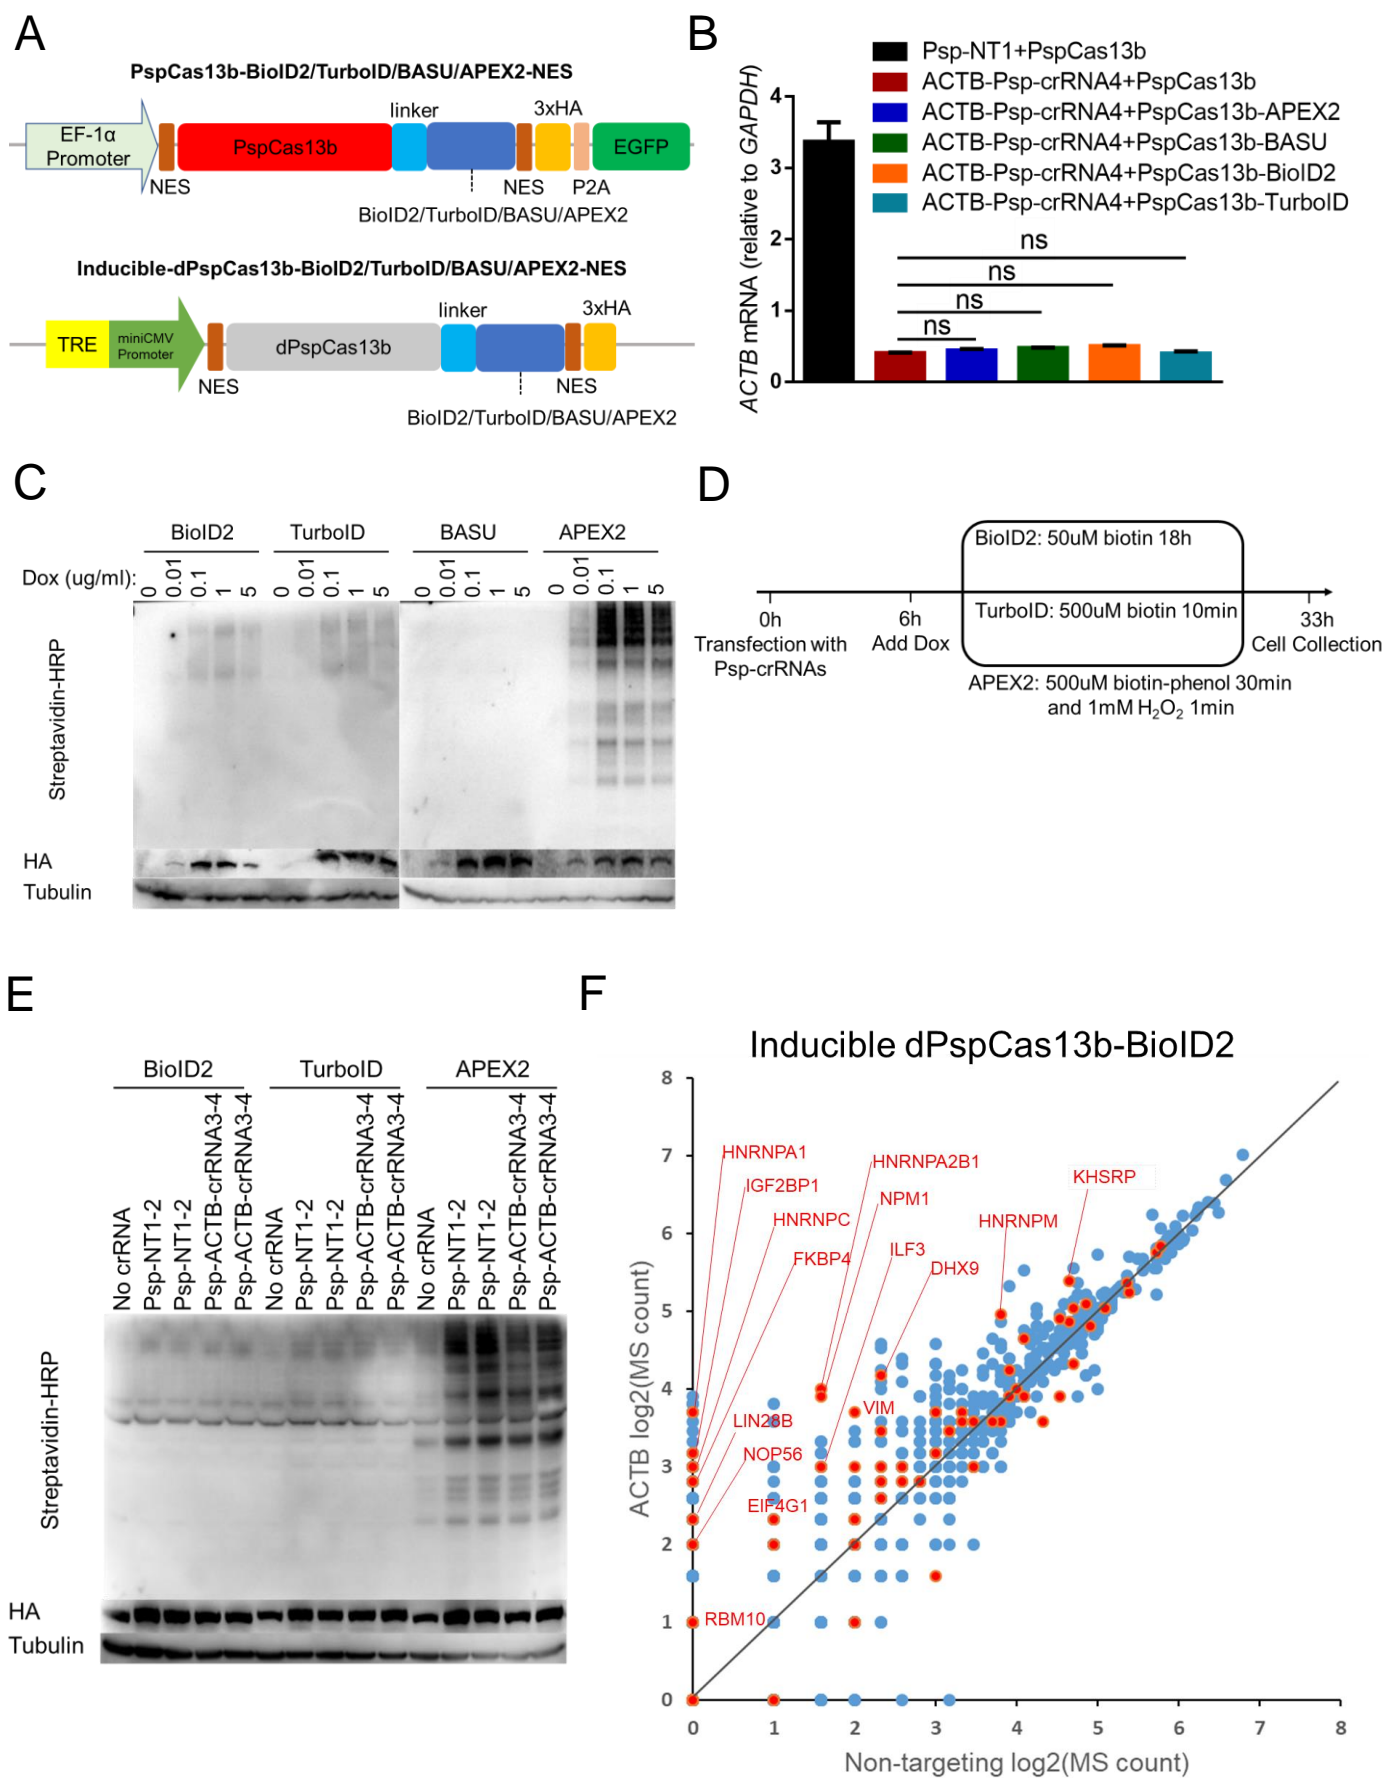

Figure 4. Using dPspCas13b-BioID2/TurboID/APEX2 inducibly expressing cell lines to identify RBPs of ACTB mRNA
