# Supplementary material for: CBRPP: a new RNA-centric method to study RNA-protein interactions
Source: bioRxiv or medRxiv preprint supplement (doi:10.1101/2020.04.09.033290), 2020-04-09
Supplement: Supplementary file [file media-1.pdf]

A

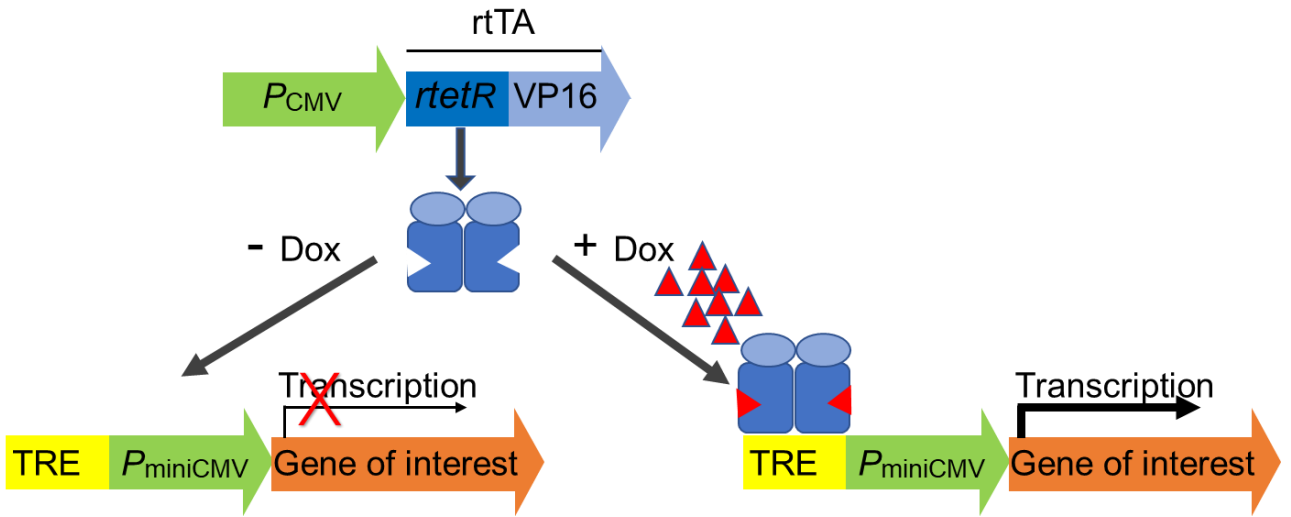

Supplementary Figure 1

**A**

Inducible dPspCas13b-APEX2

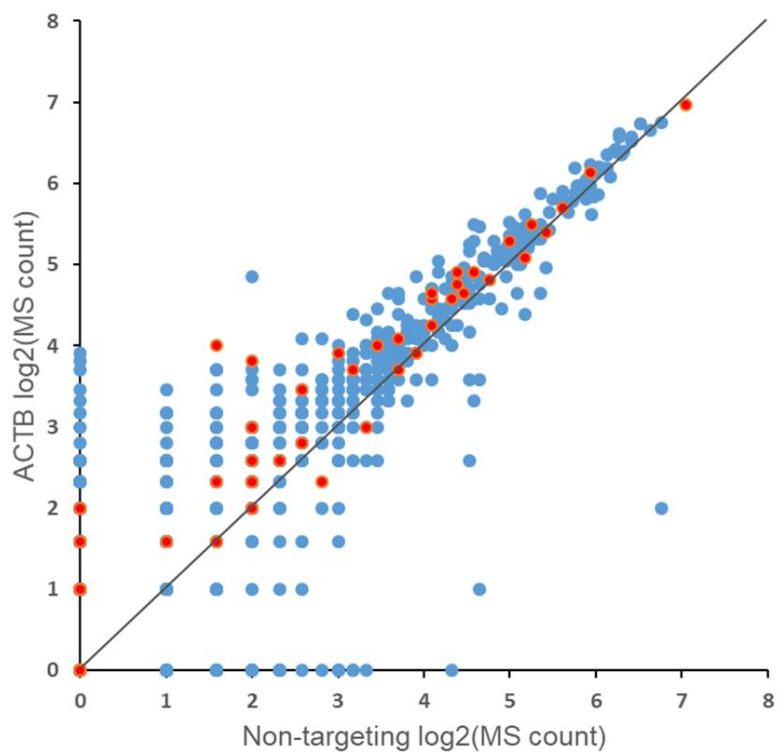**B**

Inducible dPspCas13b-TurboID

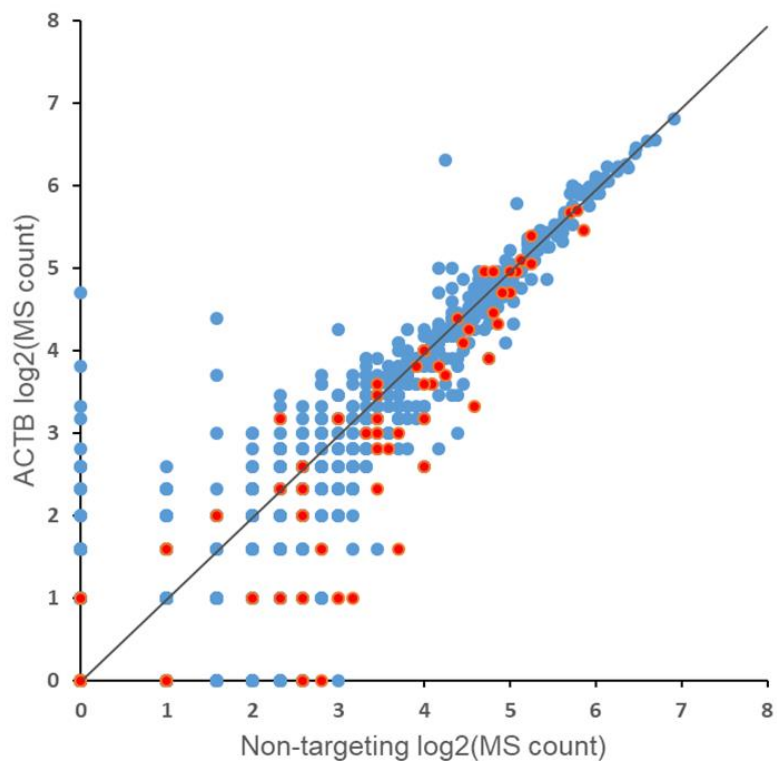

Supplementary Figure 2
